# Supplementary material for: Iron-Doped Monoclinic Strontium Iridate as a Highly Efficient Oxygen Evolution Electrocatalyst in Acidic Media
Source: MDPI journal article supplement (doi:10.3390/nano13050797), 2023-02-22
Supplement: s1 [file s1]

## Supplementary Materials

# Iron-Doped Monoclinic Strontium Iridate as a Highly Efficient Oxygen Evolution Electrocatalyst in Acidic Media

Mengjie Li <sup>1</sup>, Jiabao Ding <sup>1</sup>, Tianli Wu <sup>1,\*</sup> and Weifeng Zhang <sup>1,2,\*</sup>

<sup>1</sup> Henan Key Laboratory of Photovoltaic Materials, Henan University, Kaifeng 475004, China

<sup>2</sup> Center for Topological Functional Materials, Henan University, Kaifeng 475004, China

\* Correspondence: tianliwu@henu.edu.cn (T.W.); wfzhang@henu.edu.cn (W.Z.)

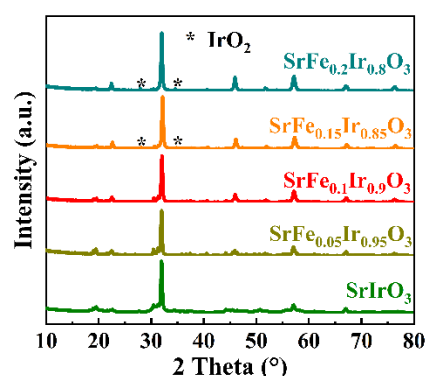

Figure S1. XRD patterns of  $\text{SrIrO}_3$  and  $\text{SrFe}_x\text{Ir}_{1-x}\text{O}_3$ .

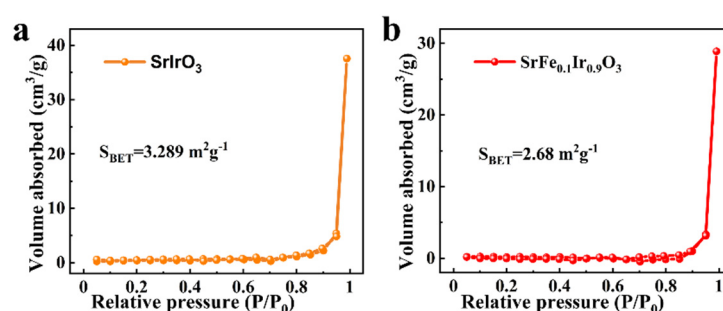

Figure S2.  $\text{N}_2$  adsorption-desorption isotherms of (a)  $\text{SrIrO}_3$  and (b)  $\text{SrFe}_{0.1}\text{Ir}_{0.9}\text{O}_3$ . The graph provides the BET surface area.

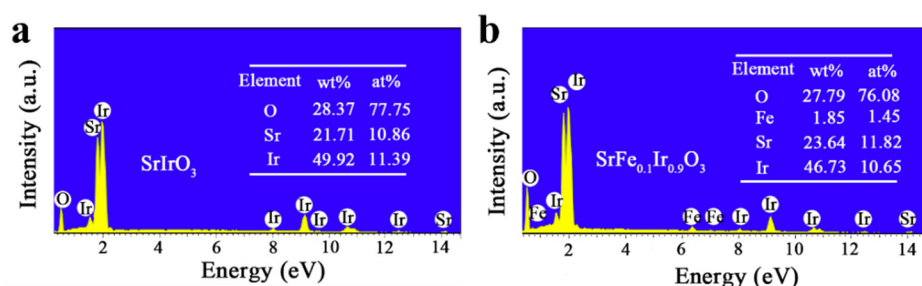

**Figure S3.** Energy Dispersive X-ray Spectroscopy (EDX) Study of (a)  $\text{SrIrO}_3$  (b) and  $\text{SrFe}_{0.1}\text{Ir}_{0.9}\text{O}_3$ .

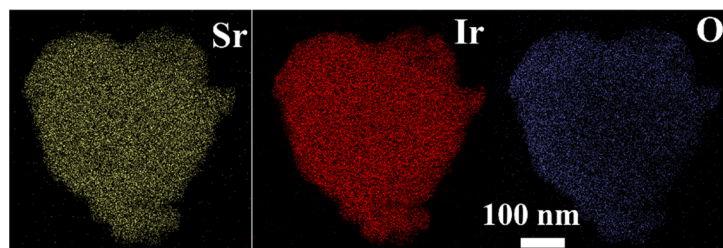

**Figure S4.** The corresponding elemental mapping image of  $\text{SrIrO}_3$  (scale bar, 100 nm).

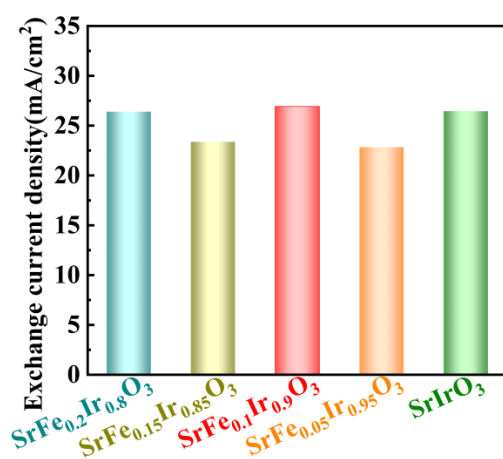

**Figure S5.** Exchange current density of  $\text{SrIrO}_3$  and  $\text{SrFe}_x\text{Ir}_{1-x}\text{O}_3$  at  $10 \text{ mA/cm}^2_{\text{geo}}$  in  $0.1 \text{ M HClO}_4$  solution.

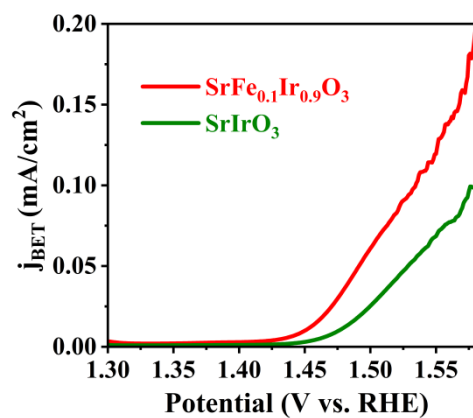

**Figure S6.** Comparisons of current densities normalized by BET surface areas for  $\text{SrIrO}_3$  and  $\text{SrFe}_{0.1}\text{Ir}_{0.9}\text{O}_3$ .

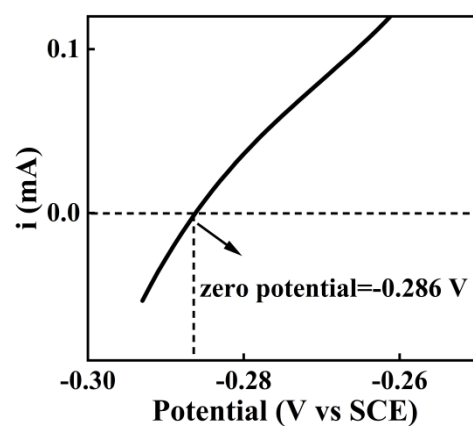

**Figure S7.** The current as a function of the applied potentials for the calibration of SCE reference electrode.

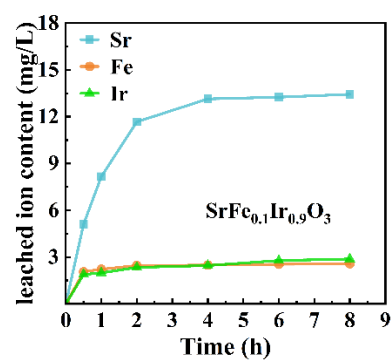

**Figure S8.** Contents of leached metals in the electrolyte in the presence of  $\text{SrFe}_{0.1}\text{Ir}_{0.9}\text{O}_3$  during 8 h long electrocatalysis.

**Table S1.** Comparison of OER activities for the catalysts in acid media.

| Catalyst                                               | Electrolyte                          | Overpotential (mV) at 10 mA/cm <sup>2</sup> | Tafel slope (mV/dec) | Reference |
|--------------------------------------------------------|--------------------------------------|---------------------------------------------|----------------------|-----------|
| SrFe <sub>0.1</sub> Ir <sub>0.9</sub> O <sub>3</sub>   | 0.1 M HClO <sub>4</sub>              | 238                                         | 50.9                 | This work |
| 6H-SrIrO <sub>3</sub>                                  | 0.1 M HClO <sub>4</sub>              | 260                                         | 54.2                 | This work |
| Ba <sub>4</sub> PrIr <sub>3</sub> O <sub>12</sub>      | 0.1 M HClO <sub>4</sub>              | 278                                         |                      | [1]       |
| Ba <sub>2</sub> PrIrO <sub>6</sub>                     | 0.1 M HClO <sub>4</sub>              | 400                                         | 55                   | [2]       |
| Sr <sub>2</sub> FeIrO <sub>6</sub>                     | 0.1 M HClO <sub>4</sub>              | 420                                         | 90                   | [3]       |
| Sr <sub>2</sub> CoIrO <sub>6</sub>                     | 0.1 M HClO <sub>4</sub>              | 305                                         | 52                   | [3]       |
| Sr <sub>2</sub> NiIrO <sub>6</sub>                     | 0.1 M HClO <sub>4</sub>              | 295                                         | 48                   | [3]       |
| SrIr <sub>0.8</sub> Zn <sub>0.2</sub> O <sub>3</sub>   | 0.1 M HClO <sub>4</sub>              | 300                                         |                      | [4]       |
| SrCo <sub>0.9</sub> Ir <sub>0.1</sub> O <sub>3-δ</sub> | 0.1 M HClO <sub>4</sub>              | 320                                         |                      | [5]       |
| La <sub>2</sub> LiIrO <sub>6</sub>                     | 0.5 M H <sub>2</sub> SO <sub>4</sub> | 300                                         | 50                   | [6]       |
| IrO <sub>x</sub> /SrIrO <sub>3</sub>                   | 0.5 M H <sub>2</sub> SO <sub>4</sub> | 270~290                                     |                      | [7]       |
| Pr <sub>2</sub> Ir <sub>2</sub> O <sub>7</sub>         | 0.1 M HClO <sub>4</sub>              | 300                                         |                      | [8]       |
| Nd <sub>2</sub> Ir <sub>2</sub> O <sub>7</sub>         | 0.1 M HClO <sub>4</sub>              | 325                                         |                      | [8]       |
| Co doped SrIrO <sub>3</sub>                            | 0.1 M HClO <sub>4</sub>              | 235                                         | 51.8                 | [9]       |
| SrTi <sub>0.67</sub> Ir <sub>0.33</sub> O <sub>3</sub> | 0.1 M HClO <sub>4</sub>              | 247                                         |                      | [10]      |
| SrZrO <sub>3</sub> -SrIrO <sub>3</sub>                 | 0.1 M HClO <sub>4</sub>              | 240                                         |                      | [11]      |
| CaCuRuO <sub>3</sub>                                   | 0.5 M H <sub>2</sub> SO <sub>4</sub> | 171                                         | 40                   | [12]      |

**Table S2.** XPS fit parameters for Ir 4f of SrFe<sub>0.1</sub>Ir<sub>0.9</sub>O<sub>3</sub> and SrIrO<sub>3</sub>.

|                                                      |                     | 4f <sub>5/2</sub> | 4f <sub>7/2</sub> | 4f <sub>5/2</sub> sat | 4f <sub>7/2</sub> sat |
|------------------------------------------------------|---------------------|-------------------|-------------------|-----------------------|-----------------------|
| SrFe <sub>0.1</sub> Ir <sub>0.9</sub> O <sub>3</sub> | Binding energy (eV) | 65.42             | 62.34             | 66.88                 | 63.81                 |
|                                                      | FWHM (eV)           | 2.32              | 2.32              | 3.1                   | 3.1                   |
| SrIrO <sub>3</sub>                                   | Binding energy (eV) | 65.04             | 61.94             | 66.47                 | 63.37                 |
|                                                      | FWHM (eV)           | 1.46              | 1.42              | 1.72                  | 1.72                  |

**Table S3.** Approximate XPS peak positions and full width half maxes(FWHM) for SrFe<sub>0.1</sub>Ir<sub>0.9</sub>O<sub>3</sub> after 10 h stability measurement.

| After OER test      | Ir 4f <sub>5/2</sub> | Ir 4f <sub>7/2</sub> | Ir 4f <sub>5/2</sub> sat | Ir 4f <sub>7/2</sub> sat |
|---------------------|----------------------|----------------------|--------------------------|--------------------------|
| Binding energy (eV) | 65.84                | 62.74                | 67.5                     | 64.28                    |
| FWHM (eV)           | 1.38                 | 1.38                 | 2.8                      | 2.8                      |

**Table S4.** Stability number (S-number) of different catalysts.

| Catalysts                                            | S-number after 8 h |
|------------------------------------------------------|--------------------|
| SrFe <sub>0.1</sub> Ir <sub>0.9</sub> O <sub>3</sub> | 25260              |
| SrIrO <sub>3</sub>                                   | 20368              |

## References

1. Gao R, Gao, R.; Zhang, Q.; Chen, H.; Chu, X.; Li, G, D.; Zou, X. Efficient acidic oxygen evolution reaction electrocatalyzed by iridium-based 12L-perovskites comprising trinuclear face-shared IrO<sub>6</sub> octahedral strings. *J. Energy Chem.* **2020**, *47*, 291–298.
2. Diaz-Morales, O.; Raaijman, S.; Kortlever, R.; Kooyman, P. J.; Wezendonk, T.; Gascon, J.; Koper, M. T. Iridium-based double perovskites for efficient water oxidation in acid media. *Nat. Commun.* **2016**, *7*, 1–6.
3. Retuerto, M.; Pascual, L.; Piqué, O.; Kayser, P.; Salam, M. A.; Mokhtar, M.; Rojas, S. How oxidation state and lattice distortion influence the oxygen evolution activity in acid of iridium double perovskites. *J. Mater. Chem. A* **2021**, *9*, 2980–2990.
4. Edgington, J.; Schweitzer, N.; Alayoglu, S.; Seitz, L. C. Constant Change: Exploring Dynamic Oxygen Evolution Reaction Catalysis and Material Transformations in Strontium Zinc Iridate Perovskite in Acid. *J. Am. Chem. Soc.* **2021**, *143*, 9961–9971.
5. Chen, Y.; Li, H.; Wang, J.; Du, Y.; Xi, S.; Sun, Y.; Xu, Z. J. Exceptionally active iridium evolved from a pseudo-cubic perovskite for oxygen evolution in acid. *Nat. Commun.* **2019**, *10*, 1–10.
6. Grimaud, A.; Demortière, A.; Saubanière, M.; Dachraoui, W.; Duchamp, M.; Doublet, M.; Tarascon, J.M. Activation of surface oxygen sites on an iridium-based model catalyst for the oxygen evolution reaction. *Nat. Energy* **2016**, *2*, 1–10.
7. Seitz, L.C.; Dickens, C.F.; Nishio, K.; Hikita, Y.; Montoya, J.; Doyle, A.; Kirk, C.; Vojvodic, A.; Hwang, H.Y.; Norskov, J.K. A highly active and stable IrO<sub>x</sub>/SrIrO<sub>3</sub> catalyst for the oxygen evolution reaction. *Science* **2016**, *353*, 1011–1014.
8. Shang, C.; Cao, C.; Yu, D.; Yan, Y.; Lin, Y.; Li, H.; Zeng, J. Electron correlations engineer catalytic activity of pyrochlore iridates for acidic water oxidation. *Adv. Mater.* **2019**, *31*, 1–6.
9. Yang, L.; Chen, H.; Shi, L.; Li, X.; Chu, X.; Chen, W.; Li, N.; Zou, X. Enhanced iridium mass activity of 6h-phase, ir-based perovskite with nonprecious incorporation for acidic oxygen evolution electrocatalysis. *ACS Appl. Mater. Interfaces* **2019**, *11*, 42006–42013.
10. Chen, H.; Shi, L.; Liang, X.; Wang, L.; Asefa, T.; Zou, X. Optimization of Active Sites via Crystal Phase, Composition, and Morphology for Efficient Low-Iridium Oxygen Evolution Catalysts. *Angew. Chem. Int. Ed.* **2020**, *59*, 19654–19658.
11. Liang, X.; Shi, L.; Cao, R.; Wan, G.; Yan, W.; Chen, H.; Zou, X. Perovskite-Type Solid Solution Nano-Electrocatalysts Enable Simultaneously Enhanced Activity and Stability for Oxygen Evolution. *Adv. Mater.* **2020**, *32*, 1–8.
12. Miao, X.; Zhang, L.; Wu, L.; Hu, Z.; Shi, L.; Zhou, S. Quadruple perovskite ruthenate as a highly efficient catalyst for acidic water oxidation. *Nat. Commun.* **2019**, *10*, 1–7.

**Disclaimer/Publisher's Note:** The statements, opinions and data contained in all publications are solely those of the individual author(s) and contributor(s) and not of MDPI and/or the editor(s). MDPI and/or the editor(s) disclaim responsibility for any injury to people or property resulting from any ideas, methods, instructions or products referred to in the content.
